# Supplementary material for: Acetylacetone promoted high-efficiency coagulation toward arsenite through a synchronous photooxidation process
Source: Royal Society of Chemistry journal article supplement (doi:10.1039/d1ew00946j), 2022-01-01
Supplement: d1ew00946j1.pdf [file d1ew00946j1.pdf]

Supplementary Information for

**Acetylacetone promoted high-efficiency coagulation toward arsenite  
through a synchronous photooxidation process**

Yixin Luo, Jiawei Yang, Xiaomeng Wang\*, Lixiang Zhou

Department of Environmental Engineering, College of Resources and Environmental  
Sciences, Nanjing Agricultural University, Nanjing 210095, P.R. China

\*Corresponding author. E-mail address: [wangxiaomeng@njau.edu.cn](mailto:wangxiaomeng@njau.edu.cn)

This file contains 7 figures.

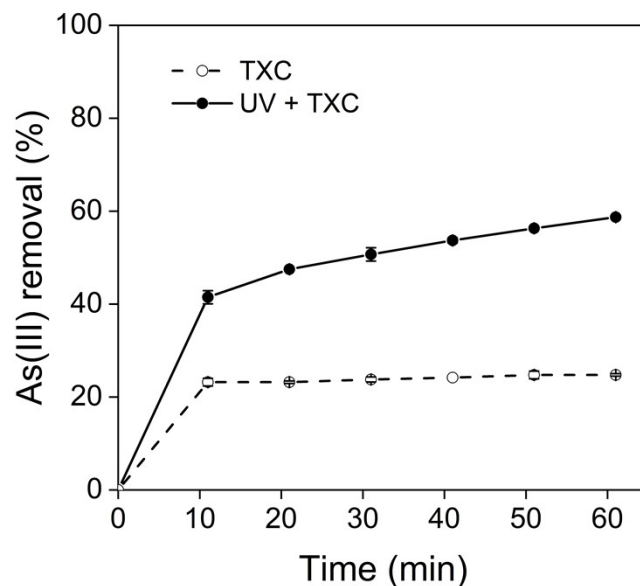

**Fig. S1.** As(III) removal kinetics in sole TXC<sub>1/4</sub> (molar ratio of AA/Ti was 1/4 during preparation process) coagulation and UV-assisted coagulation systems. Initial As(III): 1.0 mg/L, dose: 5 mg Ti/L, solution pH: 5.0.

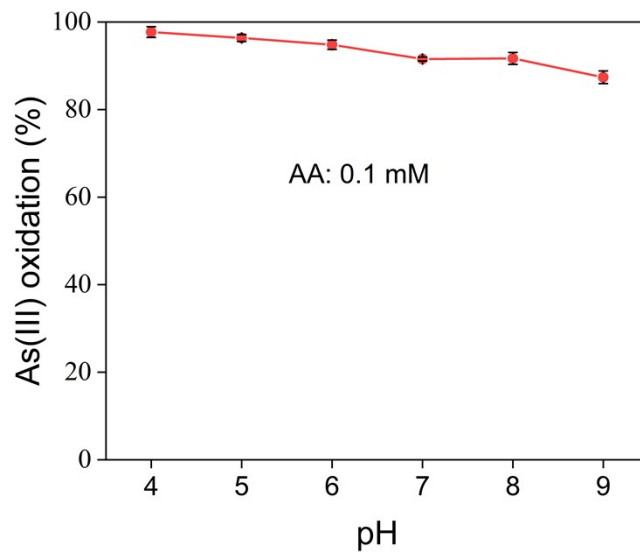

**Fig. S2.** Oxidation efficiency of As(III) by UV/AA under different pH conditions (4.0-9.0). Initial As(III): 1.0 mg/L, AA: 0.1 mM, oxidation time: 30 min.

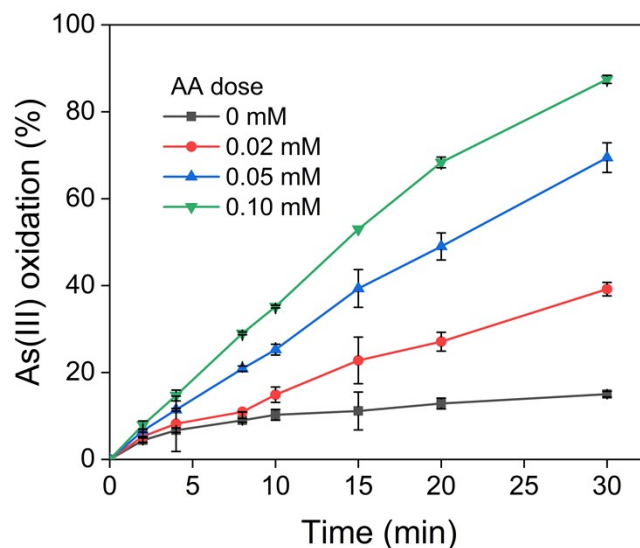

**Fig. S3.** Effect of AA dose on the oxidation efficiency of As(III). Initial As(III): 1.0 mg/L, AA: 0.02-0.1 mM, solution pH: 5.0.

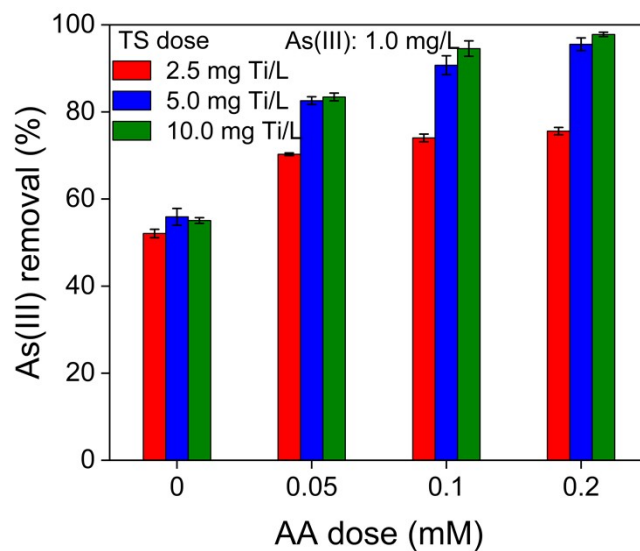

**Fig. S4.** Removal efficiency of As(III) in UV/AA + TS system with addition of various doses of TS (2.5-10 mg Ti/L) and AA (0.05-0.2 mM). Initial As(III): 1.0 mg/L, solution pH: 5.0, coagulation time: 30 min.

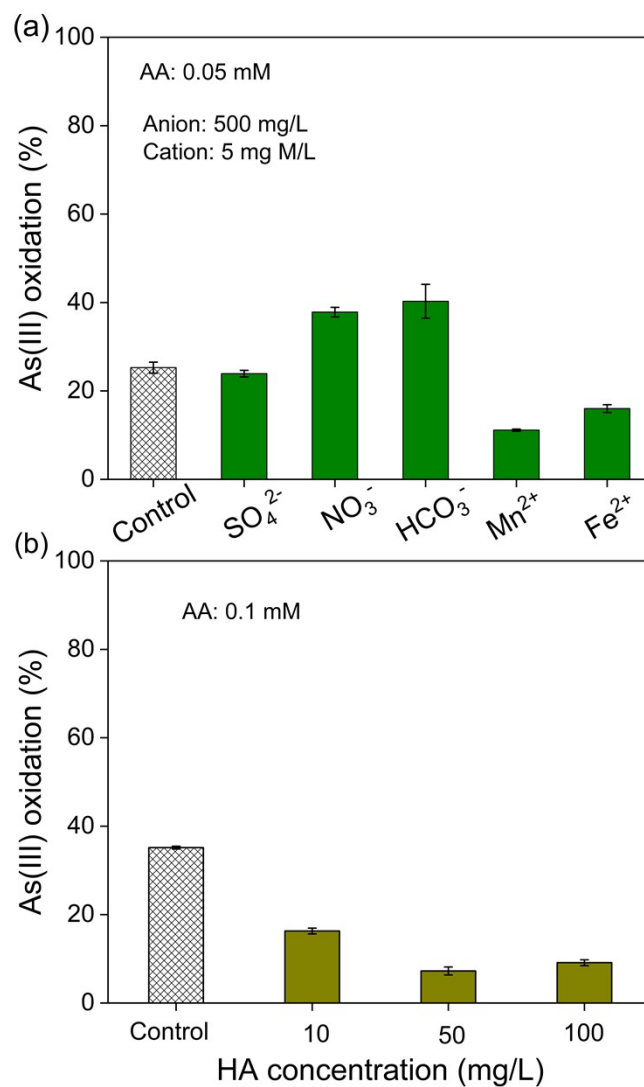

**Fig. S5.** Effects of inorganic ions (a) and HA (b) on the oxidation efficiency of As(III) by UV/AA. Initial As(III): 1.0 mg/L, AA: 0.05-0.1 mM, solution pH 5.0, anion: 500 mg/L, cation: 5 mg M/L, HA: 10-100 mg/L, oxidation time: 10 min.

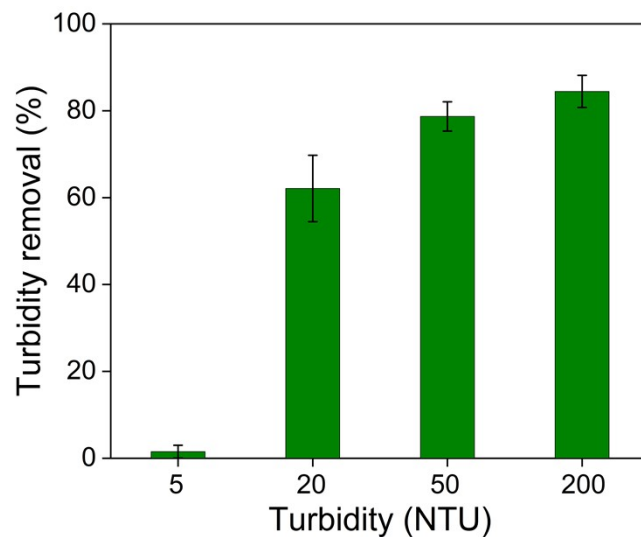

**Fig. S6.** Removal efficiency of turbidity in As(III)-turbidity coexisting wastewater by AA photooxidation-enhanced TS coagulation. As(III): 1.0 mg/L, TS: 5 mg Ti/L, AA: 0.05 mM, solution pH 5.0, coagulation time: 30 min.

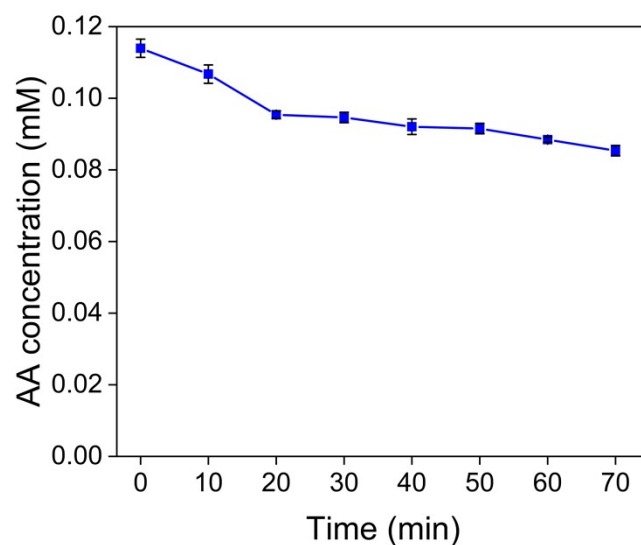

**Fig. S7.** Kinetic variation of AA concentration in UV/AA + TS system. Initial As(III): 1.0 mg/L, AA: 0.1 mM, TS: 10 mg Ti/L, solution pH: 5.0.
